# Supplementary figures and images for: Molecular risk assessment of BIG 1-98 participants by expression profiling using RNA from archival tissue
Source: Springer Nature journal article supplement (doi:10.1186/1471-2407-10-37), 2010-02-09

Fig S3 Distribution of molecular scores.

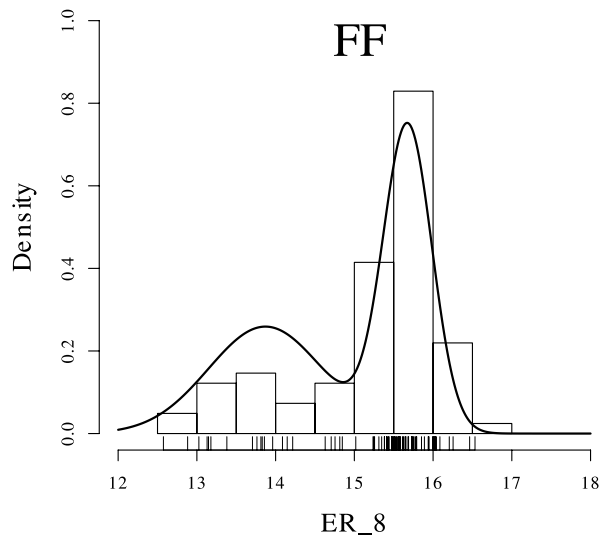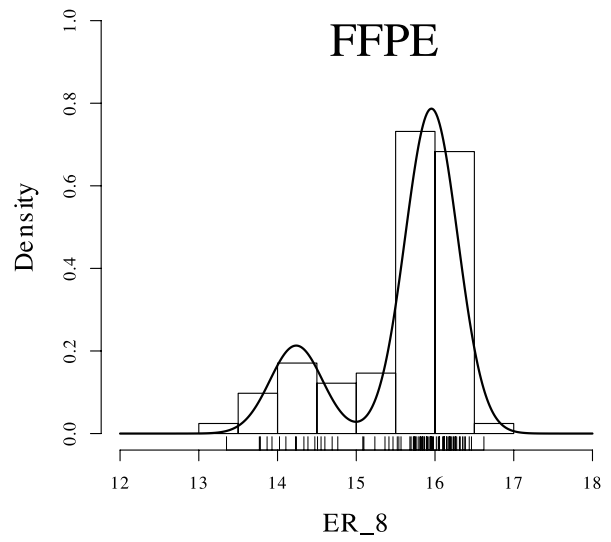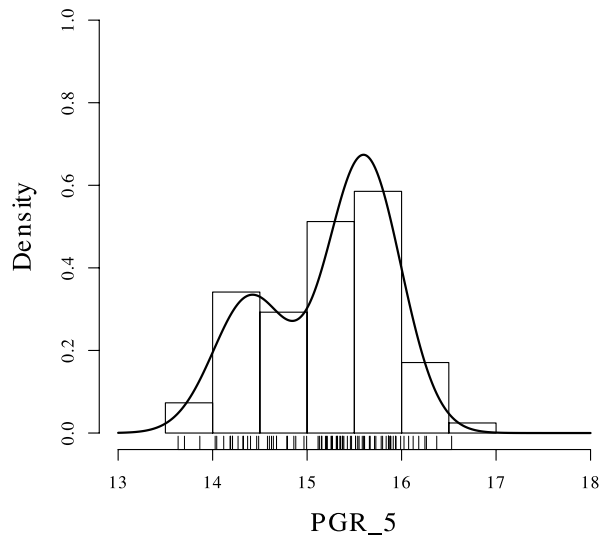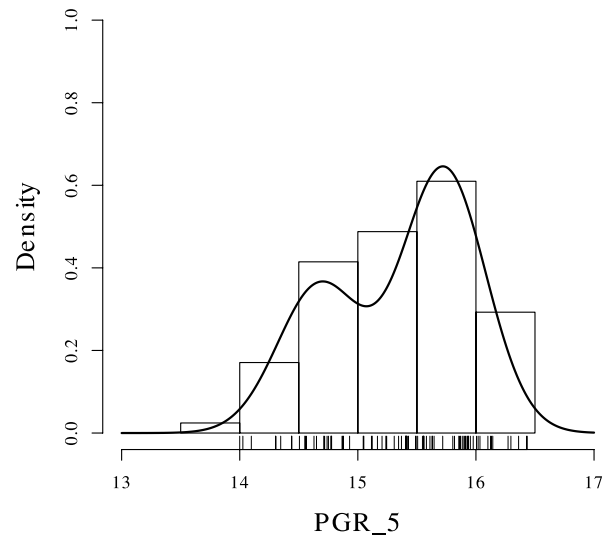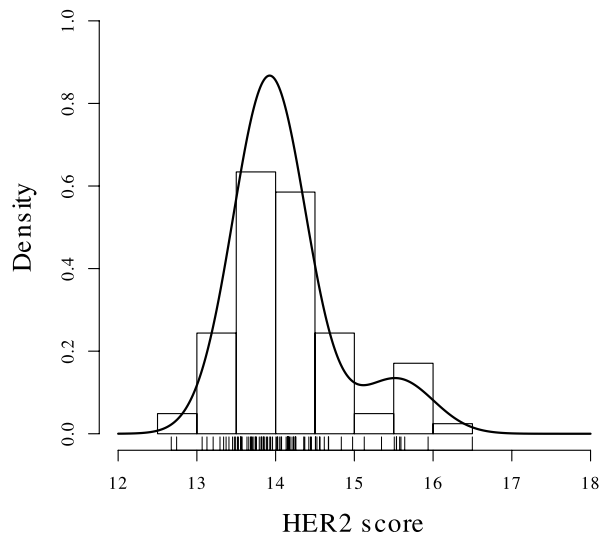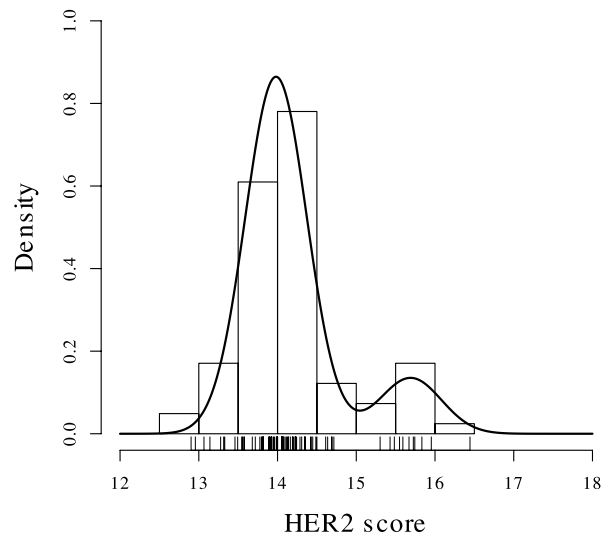

Supplement: Additional file 4 [file 1471-2407-10-37-s4.pdf]
